# Supplementary material for: Controllable growth of MoS2 nanosheets on TiO2 burst nanotubes and their photocatalytic activity
Source: Royal Society of Chemistry journal article supplement (doi:10.1039/d0ra08421b), 2020-01-01
Supplement: d0ra08421b1.pdf [file d0ra08421b1.pdf]

# Supporting Information

## Controllable growth of MoS<sub>2</sub> nanosheets on TiO<sub>2</sub> burst nanotubes and their photocatalytic activity

Qiushi Jiang<sup>a†</sup>, Shang Wang<sup>a†</sup>, Xue Li<sup>b</sup>, Zhaolian Han<sup>a</sup>, Chunli Zhao<sup>c\*</sup>, Tingting Di<sup>d</sup>,

Siyuan Liu<sup>a</sup> and Zhiqiang Cheng<sup>a\*</sup>

<sup>a</sup>College of Resources and Environment, Jilin Agricultural University, Changchun  
130118, People's Republic of China.

<sup>b</sup>College of Information Technology, Jilin Agricultural University, Changchun  
130118, People's Republic of China.

<sup>c</sup>College of Horticulture, Jilin Agricultural University, Changchun 130118, People's  
Republic of China.

<sup>d</sup>Northeast Electric Power Design Institute Co.,LTD. of China Power Engineering  
Consulting Group, Changchun 130021, People's Republic of China.

\*Correspondent Author: zcl8368@163.com (Chunli Zhao)

czq5974@163.com (Zhiqiang Cheng)

†Qiushi Jiang and Shang Wang contribute to the work equally.

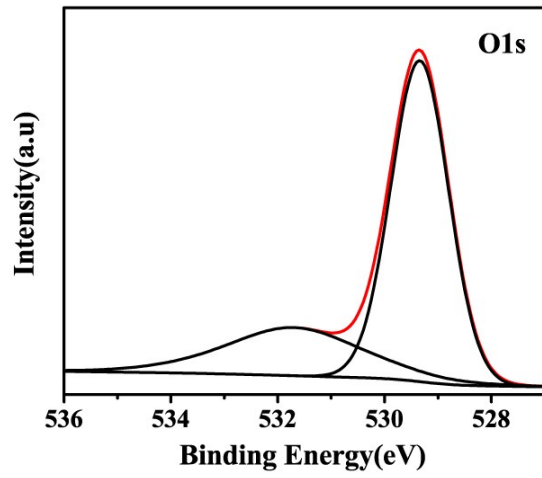

Fig. S1 O1s peaks of TiO<sub>2</sub> burst nanotubes

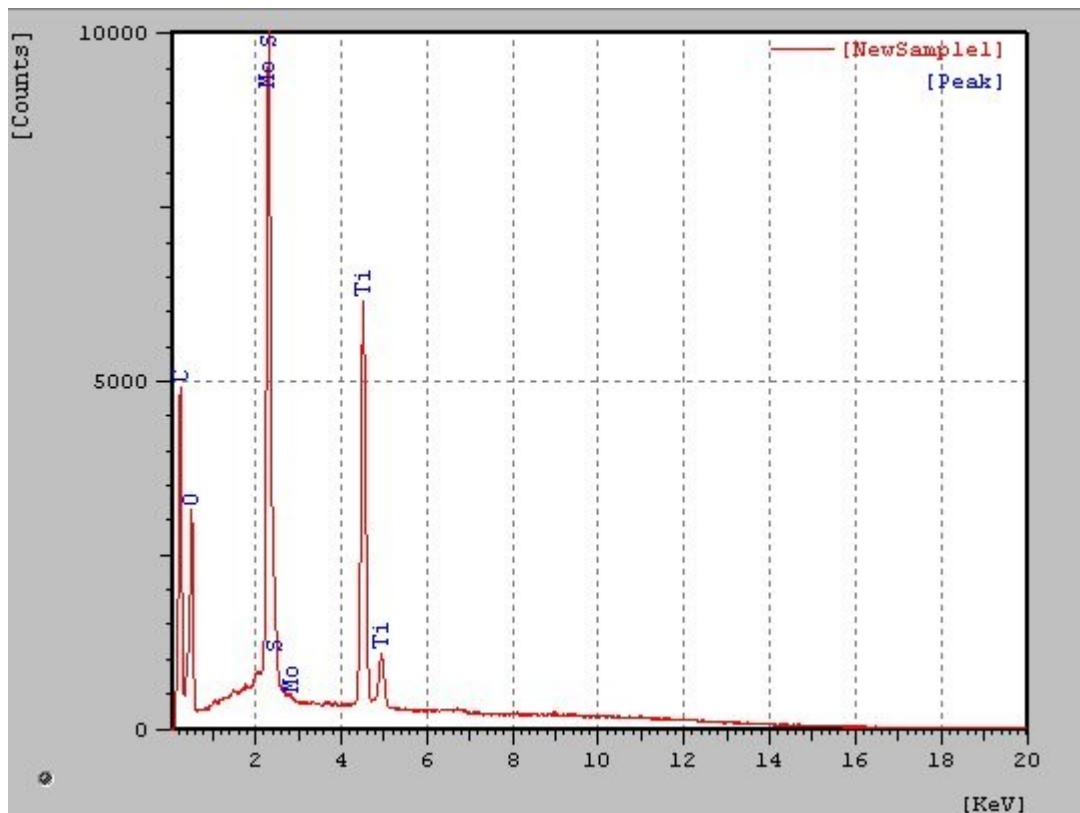

Fig.S2 EDS spectrum of TiO<sub>2</sub>/MoS<sub>2</sub> nanocomposites

Table S1. Comparison of BET surface area and pore volume of the samples.

| Photocatalyst                      | BET surface area (m <sup>2</sup> g <sup>-1</sup> ) | Pore volume (cm <sup>3</sup> g <sup>-1</sup> ) |
|------------------------------------|----------------------------------------------------|------------------------------------------------|
| TiO <sub>2</sub>                   | 41.77                                              | 0.5264                                         |
| MoS <sub>2</sub>                   | 10.59                                              | 0.1214                                         |
| TiO <sub>2</sub> /MoS <sub>2</sub> | 113.97                                             | 0.4029                                         |

Table S2. Adsorption Parameters of the Langmuir and Freundlich Models for the Adsorption of MB onto the TiO<sub>2</sub> burst nanotubes, MoS<sub>2</sub> nanosheets and TiO<sub>2</sub>/MoS<sub>2</sub> nanocomposites.

|                                    | Langmuir model                         |                |                | Freundlich model |       |                |
|------------------------------------|----------------------------------------|----------------|----------------|------------------|-------|----------------|
|                                    | q <sub>max</sub> (mg g <sup>-1</sup> ) | K <sub>L</sub> | R <sup>2</sup> | K <sub>F</sub>   | 1/n   | R <sup>2</sup> |
| TiO <sub>2</sub>                   | 5.342                                  | 0.471          | 0.993          | 4.12             | 0.054 | 0.734          |
| MoS <sub>2</sub>                   | 42.91                                  | -17.92         | 0.996          | 37.03            | 0.043 | 0.658          |
| TiO <sub>2</sub> /MoS <sub>2</sub> | 72.46                                  | 1.468          | 0.997          | 41.87            | 0.157 | 0.784          |

Table S3. Weight% and AT% of main elements in TiO<sub>2</sub>/MoS<sub>2</sub> Nanocomposites.

| Element | Weight% | AT%    |
|---------|---------|--------|
| C       | 25.966  | 41.616 |
| O       | 37.915  | 45.620 |
| S       | 7.984   | 4.794  |
| Ti      | 11.551  | 4.642  |
| Mo      | 16.584  | 3.328  |

Total 100.000 100.000

---

Table S4. The normalized MB degradation rate constant of TiO<sub>2</sub> burst nanotubes, MoS<sub>2</sub> nanosheets and TiO<sub>2</sub>/MoS<sub>2</sub> nanocomposite

|                                    | $k_{\text{MB}}$ | $S_{\text{BET}}$ | $k'_{\text{MB}}$      |
|------------------------------------|-----------------|------------------|-----------------------|
| TiO <sub>2</sub>                   | 0.003           | 41.77            | $7.18 \times 10^{-5}$ |
| MoS <sub>2</sub>                   | 0.011           | 10.59            | $1.04 \times 10^{-3}$ |
| TiO <sub>2</sub> /MoS <sub>2</sub> | 0.048           | 113.97           | $4.21 \times 10^{-4}$ |
